# Supplementary material for: Structure of the Ca2+-dependent PP2A heterotrimer and insights into Cdc6 dephosphorylation
Source: PubMed Central journal article supplement — Cell Res. 2013 Jun 11;23(7):931–46. doi: 10.1038/cr.2013.77 (PMC3698643; doi:10.1038/cr.2013.77), 2013-06-11
Supplement: cr201377x1.pdf [file cr201377x1.pdf]

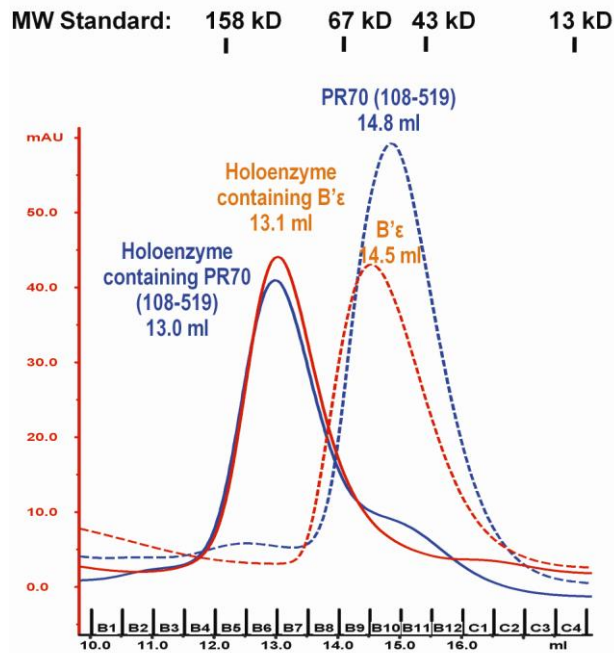

Figure S1. Related to Figure 1. Overlay of gel filtration chromatograms of PR70 (108-519) (dashed blue curve), B'ε (dashed orange curve), and the holoenzymes containing PR70 (108-519) (blue curve) and B'ε (orange curve), respectively. Although PR70 (108-519) (14.8 ml) appears to be smaller than B'ε (14.5 ml), the holoenzyme containing PR70 (108-519) (13.0 ml) has a comparable or even a slightly larger size than the holoenzyme containing B'ε (13.1 ml).
