# Supplementary material for: Structure of the Ca2+-dependent PP2A heterotrimer and insights into Cdc6 dephosphorylation
Source: PubMed Central journal article supplement — Cell Res. 2013 Jun 11;23(7):931–46. doi: 10.1038/cr.2013.77 (PMC3698643; doi:10.1038/cr.2013.77), 2013-06-11
Supplement: cr201377x2.pdf [file cr201377x2.pdf]

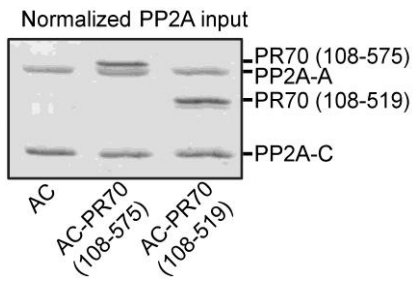

Figure S2. Related to Figure 5. Normalized input of PP2A AC core enzyme, AC-PR70 (108-575) holoenzyme, and AC-PR70 (108-519) holoenzyme for phosphatase assay in Figure 5B&C was examined by SDS-PAGE and visualized by Coomassie blue staining.
