# Supplementary material for: Structure of the Ca2+-dependent PP2A heterotrimer and insights into Cdc6 dephosphorylation
Source: PubMed Central journal article supplement — Cell Res. 2013 Jun 11;23(7):931–46. doi: 10.1038/cr.2013.77 (PMC3698643; doi:10.1038/cr.2013.77), 2013-06-11
Supplement: cr201377x4.pdf [file cr201377x4.pdf]

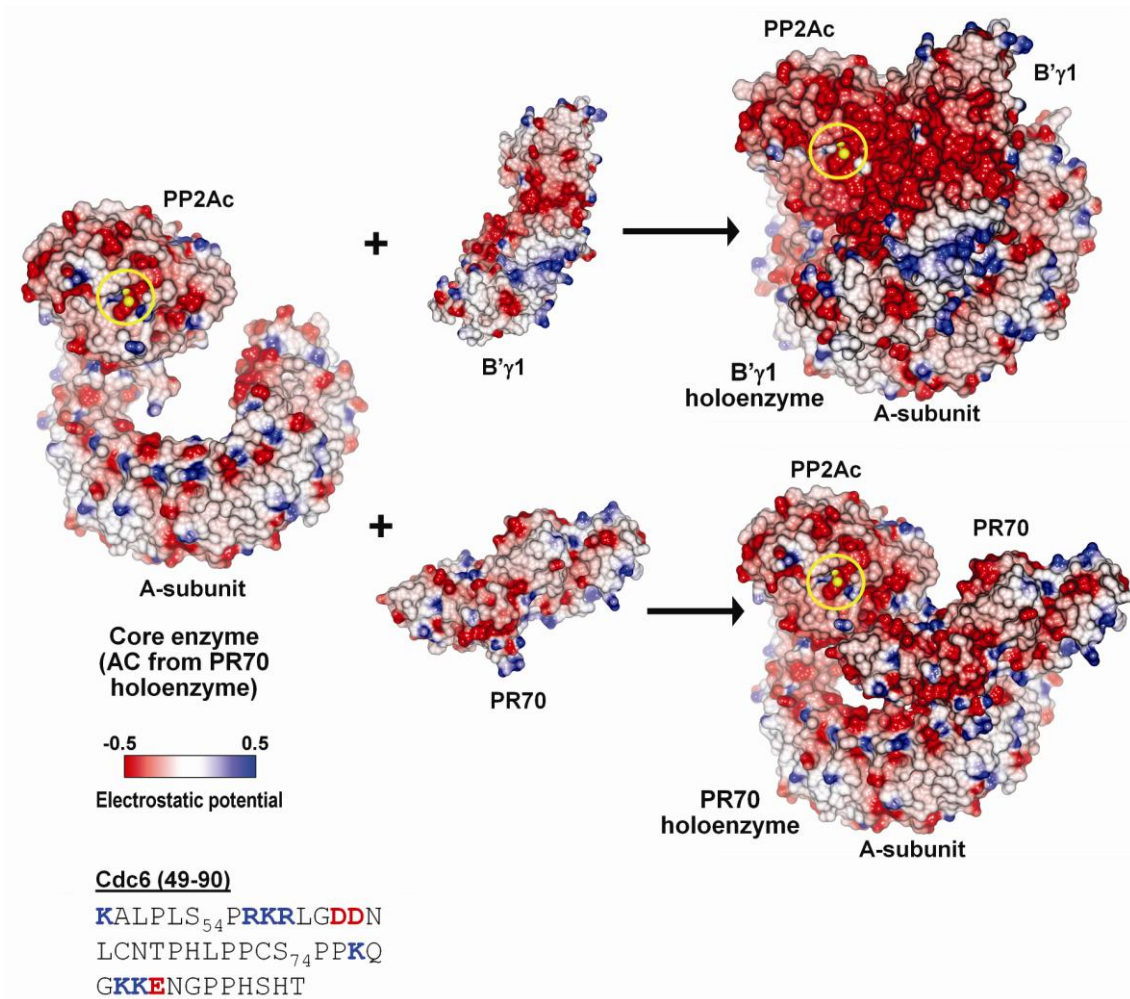

Figure S4. Related to Figure 7. Electrostatic potential of the PP2A core enzyme (AC heterodimer) and the B'ε and PR70 regulatory subunits and holoenzymes. Positive, negative, and neutral surfaces are shown in blue, red, and white, respectively. The phosphatase active sites are circled and catalytic metal ions are indicated by yellow spheres. Sequence of the PR70-binding region of Cdc6 (residues 49-90) are shown, and the positively and negatively charged residues are colored blue and red, respectively. The phosphorylation sites are indicated by residue number.
